# Supplementary material for: Biochemical and synergistic properties of a novel alpha‐amylase from Chinese nong‐flavor Daqu
Source: PubMed Central journal article supplement (PMC8028695; doi:10.1186/s12934-021-01571-w), 2021-04-07
Supplement: 12934_2021_1571_MOESM1_ESM.pdf [file 12934_2021_1571_MOESM1_ESM.pdf]

## Supplementary Material

**Table S1.** Amino acid sequences used for phylogenetic tree construction.

| Source                                          | Abbreviation      | GH13 subfamily number | Sequence similarity <sup>a</sup> (%) | GenBank or PDB accession number |
|-------------------------------------------------|-------------------|-----------------------|--------------------------------------|---------------------------------|
| <b>Fungi (GH13_1)</b>                           |                   |                       |                                      |                                 |
| <i>Aspergillus oryzae</i>                       | AmyA              | 1                     | 64.4                                 | 2GUY_A                          |
| <i>Malbranchea cinnamomea</i>                   | McAmyA            | 1                     | 59.0                                 | 3VM7_A                          |
| <i>Aspergillus niger</i>                        | $\alpha$ -amylase | 1                     | 55.3                                 | 2AAA_A                          |
| <b>Bacteria (GH13_2)</b>                        |                   |                       |                                      |                                 |
| <i>Bacillus stearothermophilus</i>              | Novamyl           | 2                     | 26.9                                 | 1QHO_A                          |
| <i>Thermoanaerobacterium thermosulfurigenes</i> | CGTase            | 2                     | 23.1                                 | 3BMV_A                          |
| <b>Fungi (GH13_5)</b>                           |                   |                       |                                      |                                 |
| <i>Paecilomyces variotii</i>                    | alpha-amylase     |                       | 77.6                                 | XP_028489551.1                  |
| <i>Aspergillus niger</i>                        | AmyD              | 5                     | 64.4                                 | XP_001389762.2                  |
| <i>Aspergillus niger</i>                        | AmyF              | 5                     | 54.5                                 | XP_001393627.2                  |
| <i>Paracoccidioides brasiliensis</i>            | Amy1              | 5                     | 39.1                                 | ABS11196.1                      |
| <b>Bacteria (GH13_5)</b>                        |                   |                       |                                      |                                 |
| <i>Bacillus</i> sp. 707                         | G6-amylase        | 5                     | 47.5                                 | 1WP6_A                          |
| <i>Bacillus licheniformis</i>                   | alpha-amylase     | 5                     | 47.0                                 | 1OB0_A                          |
| <i>Bacillus</i> sp. Ksm-1378                    | AmyK              | 5                     | 46.8                                 | 2DIE                            |
| <i>Bacillus halmapalus</i>                      | alpha-amylase     | 5                     | 46.7                                 | 1W9X                            |
| <i>Bacillus amyloliquefaciens</i>               | BAA               | 5                     | 46.4                                 | 3BH4_A                          |
| <i>Geobacillus stearothermophilus</i>           | AmyS              | 5                     | 45.3                                 | 4UZU_A                          |
| <i>Bacillus</i> sp. strain KSM-K38              | AmyK38            | 5                     | 44.5                                 | 1UD2_A                          |
| <i>Alicyclobacillus</i> sp. 18711               | AliC              | 5                     | 44.2                                 | 6GXV_A                          |
| <i>Halothermothrix orenii</i>                   | AmyB              | 5                     | 31.7                                 | 3BC9_A                          |
| <b>Plants (GH13_6)</b>                          |                   |                       |                                      |                                 |
| <i>Hordeum vulgare</i>                          | Amy1              | 6                     | 26.6                                 | 2QPS_A                          |
| <i>Hordeum vulgare</i>                          | Amy2              | 6                     | 22.6                                 | 1AMY_A                          |
| <b>Archaea (GH13_7)</b>                         |                   |                       |                                      |                                 |
| <i>Pyrococcus woesei</i>                        | PWA               | 7                     | 45.0                                 | 1MWO_A                          |
| <i>Pyrococcus woesei</i>                        | alpha-amylase     | 7                     | 28.2                                 | 3QGV_A                          |
| <b>Bacteria (GH13_10)</b>                       |                   |                       |                                      |                                 |
| <i>Deinococcus radiodurans</i> R1               | MTHase            | 10                    | 33.8                                 | 2BHU_A                          |
| <b>Bacteria (GH13_20)</b>                       |                   |                       |                                      |                                 |
| <i>Thermus</i> sp. IM6501                       | ThMA              | 20                    | 24.7                                 | 1SMA_A                          |
| <i>Geobacillus stearothermophilus</i>           | Neopullulanase    | 20                    | 20.9                                 | 1J0H_A                          |

|                                          |         |         |      |        |
|------------------------------------------|---------|---------|------|--------|
| <b>Archaea (GH13_20)</b>                 |         |         |      |        |
| <i>Thermococcus kodakarensis</i><br>KOD1 | TK-PUL  | 20      | 37.7 | 5OT1_A |
| <b>Bacteria (GH13_31)</b>                |         |         |      |        |
| <i>Erwinia rhapontici</i>                | NX-5    | 31      | 24.5 | 4HOW_A |
| <i>Listeria monocytogenes</i> EGD-e      | Lmo0184 | 31      | 23.9 | 5DO8_A |
| <b>Yeast (GH13_40)</b>                   |         |         |      |        |
| <i>Saccharomyces cerevisiae</i>          | Ima1    | 40      | 28.7 | 3AXH_A |
| <b>Bacteria (GH13_?)</b>                 |         |         |      |        |
| <i>Anoxybacillus ayderensis</i>          | ASKA    | unknown | 33.2 | 5A2A_A |
| <i>Geobacillus thermoleovorans</i>       | GTA     | unknown | 32.2 | 4E2O_A |

<sup>a</sup> The similarities of  $\alpha$ -amylases were compared to NFAmy13B, except for those in group GH13\_1, which were compared to NFAmy13A.

**Table S2.** The hydrolysis of NFAmy13B on various substrates.

| Substrate      | Main linkage/monomer                                                                                   | Glucose equivalents (mM)<br>(mean $\pm$ standard deviation) |
|----------------|--------------------------------------------------------------------------------------------------------|-------------------------------------------------------------|
| Soluble starch | $\alpha$ -(1 $\rightarrow$ 4)- $\alpha$ -(1 $\rightarrow$ 6) glucose                                   | 1.23 $\pm$ 0.06                                             |
| Amylopectin    | $\alpha$ -(1 $\rightarrow$ 4)- $\alpha$ -(1 $\rightarrow$ 6) glucose                                   | 11.6 $\pm$ 0.3                                              |
| Amylose        | $\alpha$ -(1 $\rightarrow$ 4) glucose                                                                  | 5.73 $\pm$ 1.24                                             |
| Wheat starch   | $\alpha$ -(1 $\rightarrow$ 4)- $\alpha$ -(1 $\rightarrow$ 6) glucose                                   | 6.06 $\pm$ 1.06                                             |
| Potato starch  | $\alpha$ -(1 $\rightarrow$ 4)- $\alpha$ -(1 $\rightarrow$ 6) glucose                                   | 5.42 $\pm$ 0.71                                             |
| Corn starch    | $\alpha$ -(1 $\rightarrow$ 4)- $\alpha$ -(1 $\rightarrow$ 6) glucose                                   | 7.09 $\pm$ 0.66                                             |
| Xylan          | $\beta$ -(1 $\rightarrow$ 4) xylose                                                                    | 0                                                           |
| Laminarin      | $\beta$ -(1 $\rightarrow$ 3) and $\beta$ -(1 $\rightarrow$ 6)-glucose                                  | 0                                                           |
| Dextrin        | $\alpha$ -(1 $\rightarrow$ 4) and $\alpha$ -(1 $\rightarrow$ 4)- $\alpha$ -(1 $\rightarrow$ 6) glucose | 6.79 $\pm$ 0.85                                             |
| Glycogen       | $\alpha$ -(1 $\rightarrow$ 4)- $\alpha$ (1 $\rightarrow$ 6) glucose                                    | 0.225 $\pm$ 0.030                                           |
| Pullulan       | $\alpha$ -(1 $\rightarrow$ 6) glucose                                                                  | 0.0692 $\pm$ 0.0948                                         |
| Arabinoxylan   | $\beta$ -(1 $\rightarrow$ 4) arabinose and xylose                                                      | 0                                                           |
| Cellulose      | $\beta$ -(1 $\rightarrow$ 4) glucose                                                                   | 0                                                           |

Each experiment was performed in triplicate.

**Table S3.** Degradation capacity of NFAMY13A and NFAMY13B on wheat starch.

| Enzyme   | Concentration (nM) | Reducing ends (mM) |
|----------|--------------------|--------------------|
| NFAMY13B | 20                 | 6.71±0.46          |
|          | 900                | 4.67±0.30          |
| NFAMY13A | 1000               | 6.63±1.16          |
|          | 1100               | 7.70±1.75          |
|          | 1200               | 7.18±1.62          |

Each experiment was performed in triplicate.

**Table S4.** The hydrolysis of NFAMY13A and NFAMY13B on maltooligosaccharides (M3~M5).

| Substrate | Enzyme   | Product component | The yield of reducing ends (mM) (mean ± standard deviation) |              |             |
|-----------|----------|-------------------|-------------------------------------------------------------|--------------|-------------|
|           |          |                   | 5 min                                                       | 20 min       | 60 min      |
| M3        | NFAMY13A | M1                | 1.52±0.11                                                   | 2.47±0.05    | 3.29±0.09   |
|           |          | M2                | 1.96±0.11                                                   | 2.97±0.05    | 3.84±0.02   |
| M4        | NFAMY13A | M1                | 0.727±0.024                                                 | 1.34±0.05    | 2.17±0.08   |
|           |          | M2                | 7.32±0.07                                                   | 7.79±0.21    | 8.53±0.17   |
|           |          | M3                | 1.43±0.06                                                   | 0.657±0.176  | 0           |
|           | NFAMY13B | M1                | 0.0984±0.0394                                               | 0.208±0.024  | 0.335±0.061 |
|           |          | M2                | 0.269±0.058                                                 | 1.01±0.06    | 2.66±0.05   |
|           |          | M3                | 0.0867±0.1279                                               | 0.483±0.063  | 0.817±0.195 |
| M5        | NFAMY13A | M1                | 1.02±0.17                                                   | 2.99±0.04    | 5.33±0.02   |
|           |          | M2                | 8.93±0.39                                                   | 11.6±0.1     | 13.5±0.1    |
|           |          | M3                | 5.59±0.07                                                   | 3.65±0.15    | 1.07±0.06   |
|           |          | M4                | 0                                                           | 0            | 0           |
|           | NFAMY13B | M1                | 0                                                           | 0.0951±0.770 | 0           |
|           |          | M2                | 5.81±0.03                                                   | 6.94±0.07    | 7.18±0.04   |
|           |          | M3                | 7.05±0.22                                                   | 8.18±0.09    | 7.99±0.21   |
|           |          | M4                | 0                                                           | 0            | 0           |

Each experiment was performed in triplicate.

**Table S5.** Comparison of alkali-resisting  $\alpha$ -amylases.

| Amylase                        | Source                            | Optimum pH | pH stability <sup>b</sup> | References |
|--------------------------------|-----------------------------------|------------|---------------------------|------------|
| NFAMY13B                       | Unknown                           | 5.5~6.0    | pH 5.5~12.5, 1 h, >90%    | This study |
| G6-amylase                     | <i>Bacillus</i> sp.               | 8.8        | pH 4.7~10.8, 30 min, >50% | [1]        |
| TdAmyA                         | <i>Thermomyces dupontii</i>       | 6.5        | pH 4.5~10.0, 30 min, >80% | [2]        |
| Amy1                           | <i>Bacillus amyloliquefaciens</i> | 6.0        | pH 7.0~9.0, 1 h, 90%      | [3]        |
| $\alpha$ -amylase <sup>a</sup> | <i>Bacillus</i> sp.               | 5.0        | pH 4.5~11.0, 1 h, 80%     | [4]        |
| $\alpha$ -amylase <sup>a</sup> | <i>Bacillus</i> sp.               | 10.5       | pH 10.5, 15 h, 55%        | [5]        |
| $\alpha$ -amylase <sup>a</sup> | <i>Halorubrum xinjiangense</i>    | 8.5        | pH 7~11, 1 h, >45%        | [6]        |
| $\alpha$ -amylase <sup>a</sup> | <i>Bacillus</i> sp.               | 8.0        | pH 6~13, 30 min, >67%     | [7]        |
| TfAmy48                        | <i>Tepidimonas fonticaldi</i>     | 8.0        | pH 11, 6 h, 50%           | [8]        |
| McAmyA <sup>a</sup>            | <i>Malbranchea cinnamomea</i>     | 6.5        | pH 5.0~10.0, 30 min, >90% | [9]        |

<sup>a</sup> Amylases were produced by the originated organism.

<sup>b</sup> This column indicates the residual activities of  $\alpha$ -amylases pre-treated in the range of specified pH with designated time.

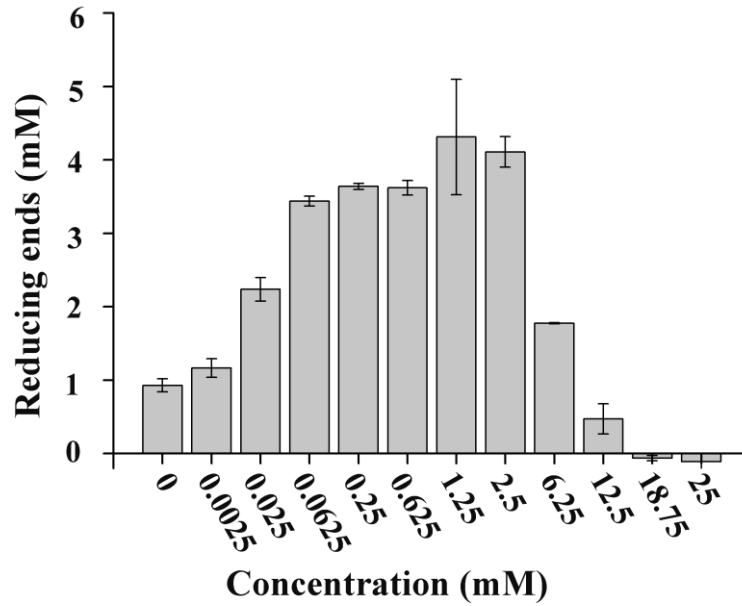

**Fig. S1** Effect of the concentrations of calcium divalent ion on NFAMY13B thermostability. Enzyme (75 nM) was incubated with different concentrations of  $\text{CaCl}_2$  at pH 6.0 and 55 °C for 30 min. The residual activities were determined by incubating 30 nM enzyme with 5 mg/mL potato starch at 54 °C and pH 6.0 for 30 min. Each experiment was performed in triplicate.

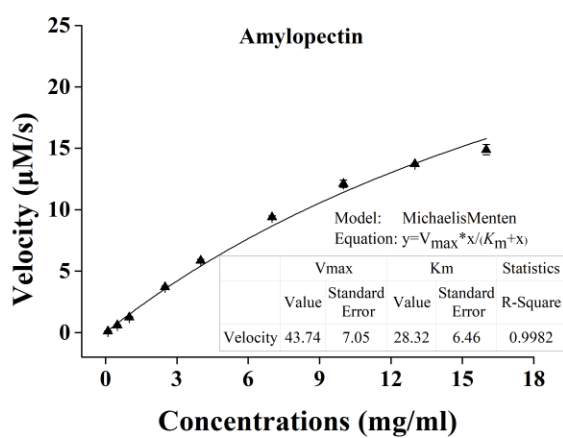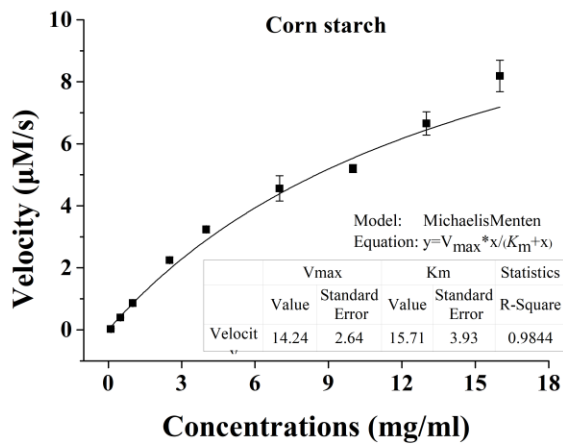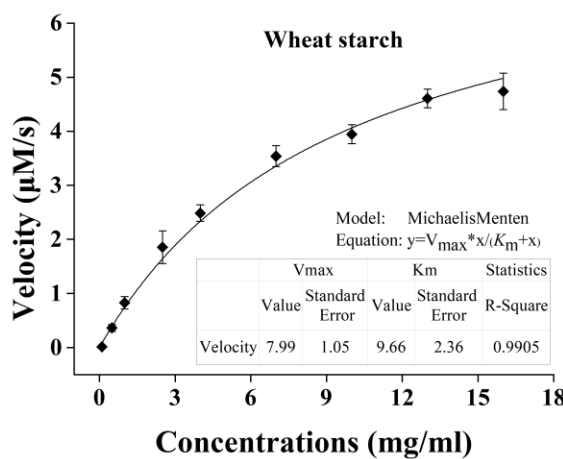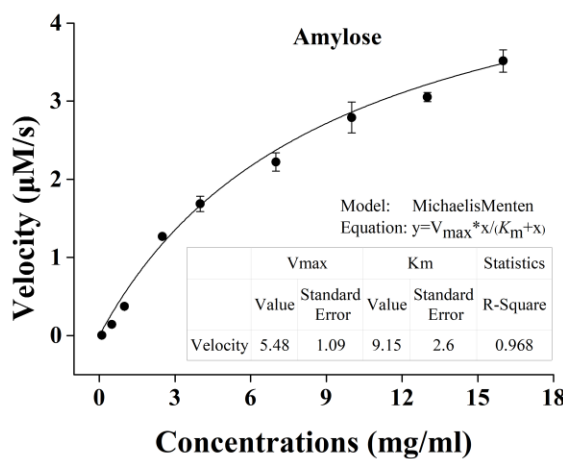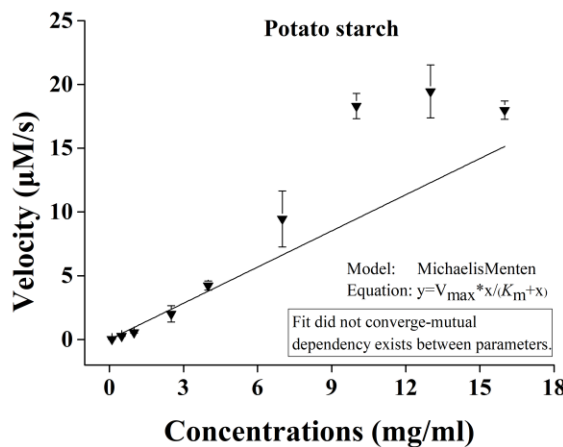

**Fig. S2** Kinetic studies of the NFAmy13B on the different substrates. 20 nM enzyme with 1.25 mM CaCl<sub>2</sub> was incubated with various concentrations substrate between 0.1 and 16 mg/mL at 54 °C for 20 min. Each experiment was performed in quadruplicate.

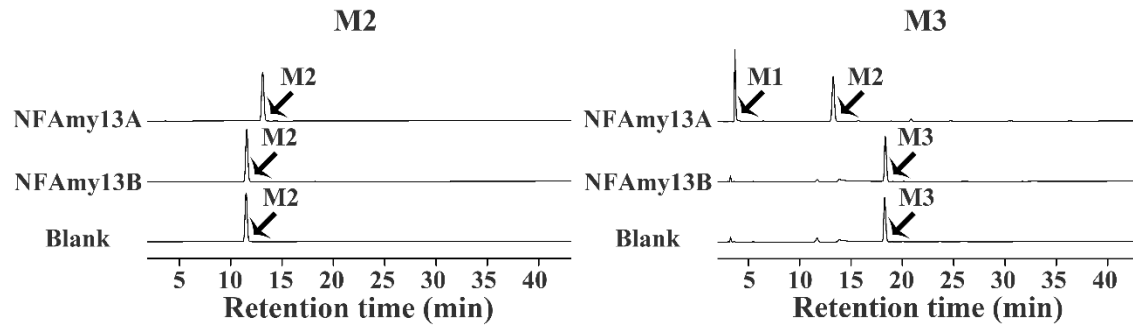

**Fig. S3** Hydrolysis of maltooligosaccharides by NFAMY13A and NFAMY13B. 5 mM M2 and M3 were hydrolyzed by 1  $\mu$ M NFAMY13A or NFAMY13B in the presence of 1.25 mM CaCl<sub>2</sub> at pH 6.0 and 54 °C for 2 h. The reaction products were analyzed by HPAEC-PAD. M1, glucose; M2, maltose; M3, maltotriose.

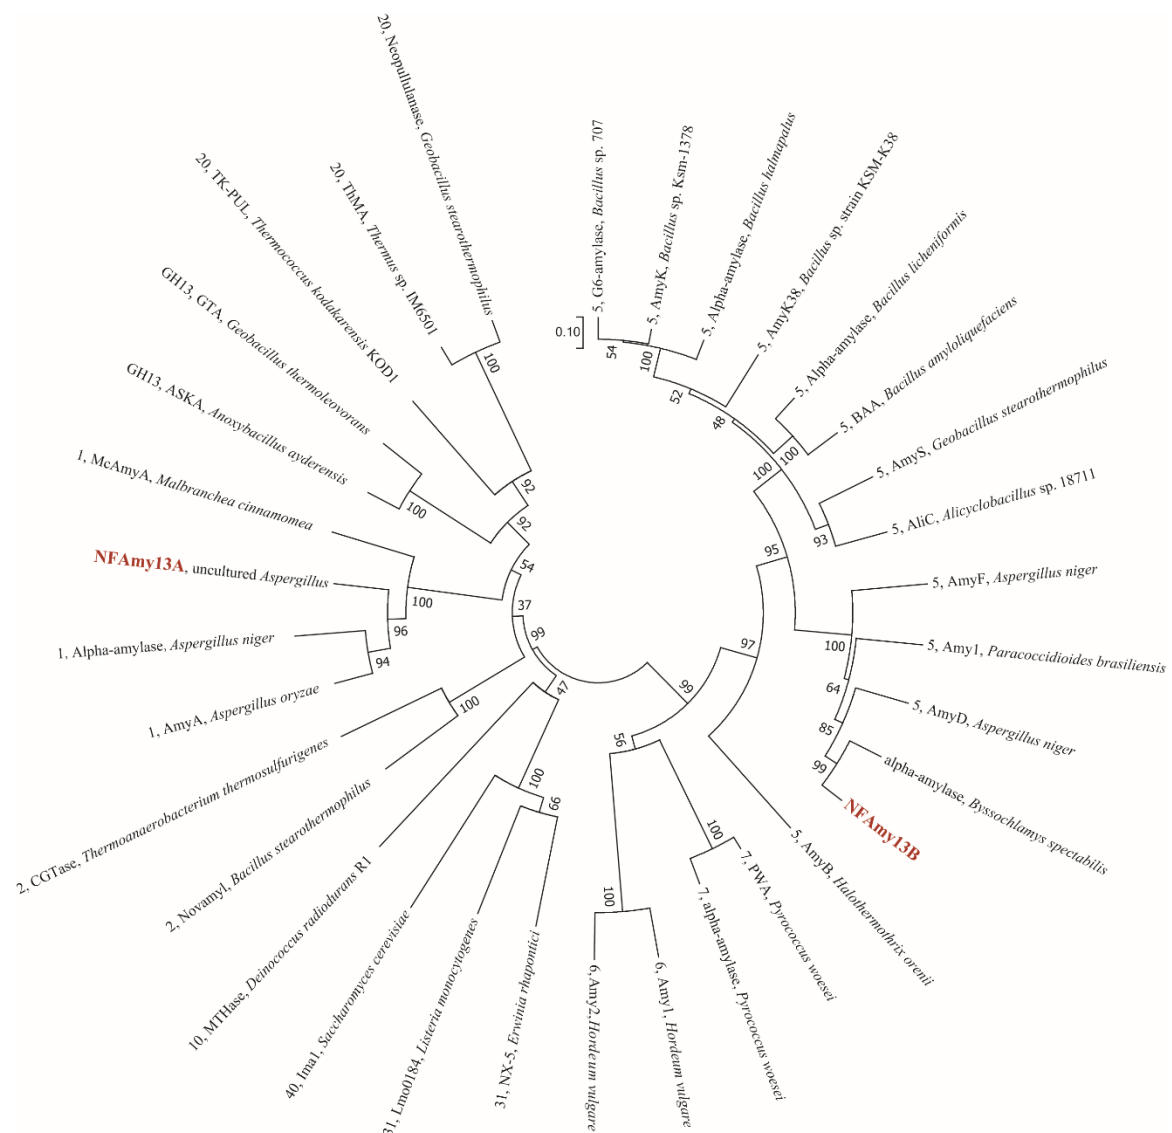

**Fig. S4** Phylogenetic analysis of NFAMY13A and NFAMY13B. The amino acid sequences of enzymes from GH13 used for the construction of the phylogenetic tree were selected according to the similarities with NFAMY13A or NFAMY13B. Each enzyme was indicated a number corresponding to

the GH13 subfamily, its abbreviation, and source. Details are provided in Table S1.

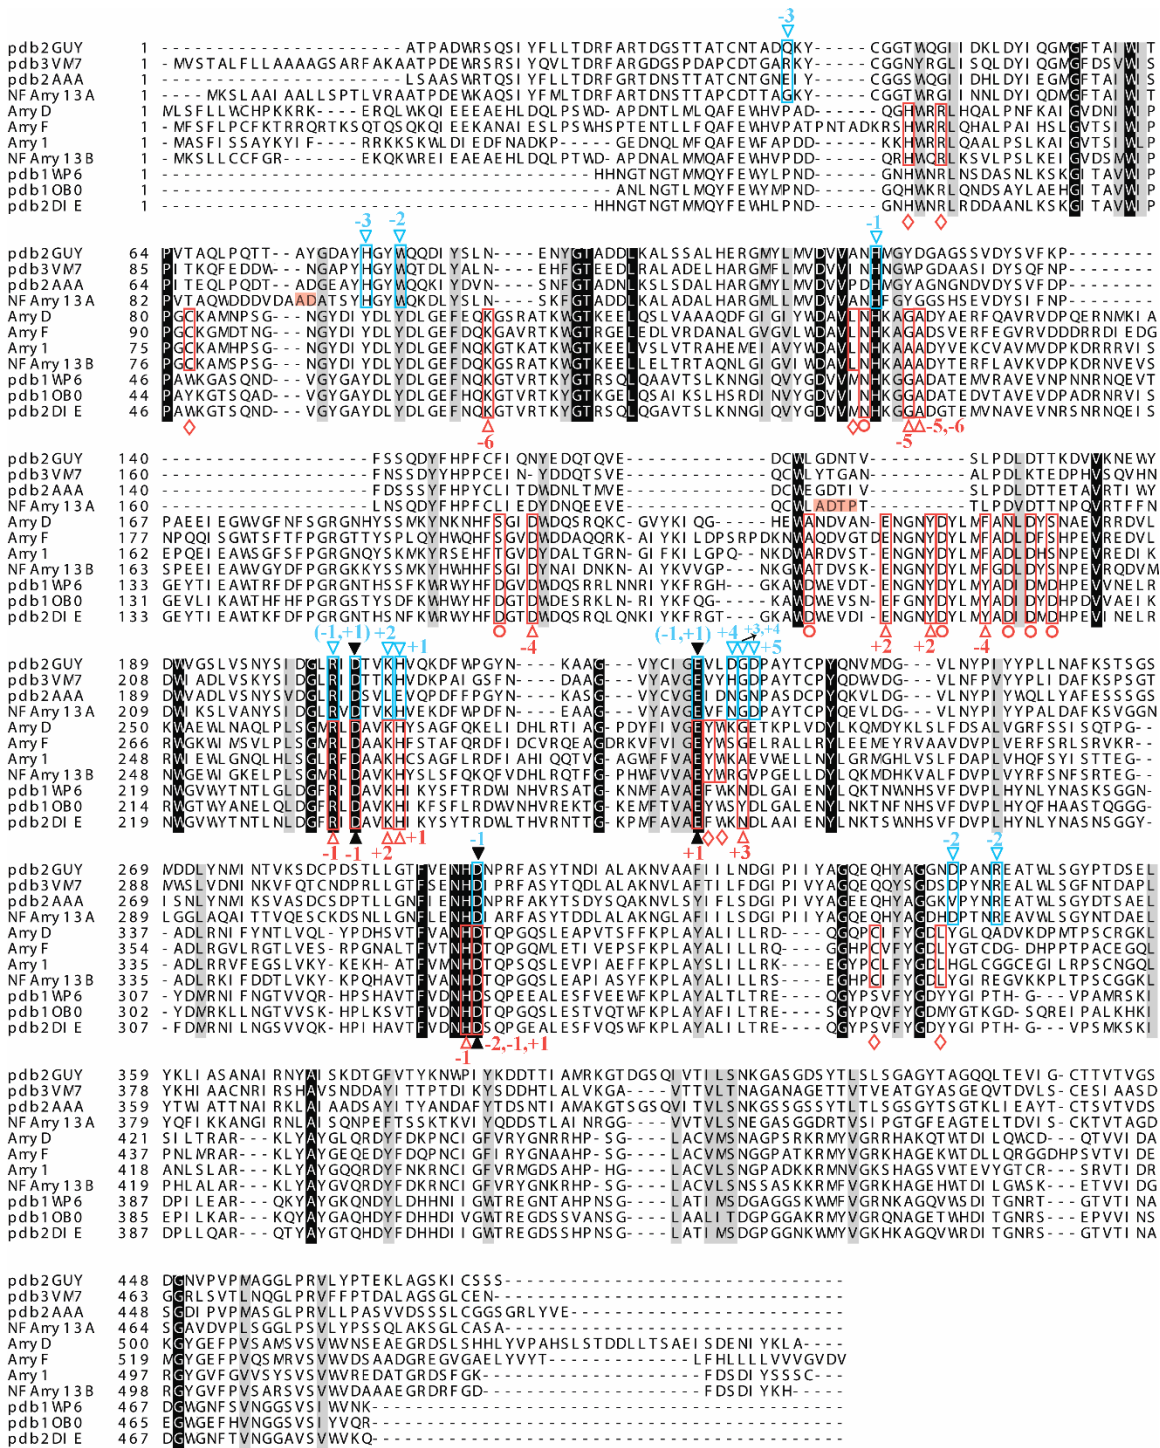

▼▲ Catalytic sites    △ NFAMY13B binding sites    ▽ NFAMY13A binding sites  
 ○ NFAMY13B metal ions binding sites    ■ NFAMY13A blocks residues  
 ◇ Conserved amino acids of fungal  $\alpha$ -amylase in group GH13\_5

Fig. S5 Amino acid sequences alignment in NFAMY13A/B and high-similarity  $\alpha$ -amylases.

## References

1. Kanai R, Haga K, Akiba T, Yamane K, Harata K: **Biochemical and crystallographic analyses of maltohexaose-producing amylase from alkalophilic *Bacillus* sp. 707.** *Biochemistry* 2004, **43**:14047-14056.
2. Wang Y-c, Zhao N, Ma J-w, Liu J, Yan Q-j, Jiang Z-q: **High-level expression of a novel alpha-amylase from *Thermomyces dupontii* in *Pichia pastoris* and its application in maltose syrup production.** *Int J Biol Macromol* 2019, **127**:683-692.
3. Chen J, Chen X, Dai J, Xie G, Yan L, Lu L, Chen J: **Cloning, enhanced expression and characterization of an alpha-amylase gene from a wild strain in *B. subtilis* WB800.** *Int J Biol Macromol* 2015, **80**:200-207.
4. Liu XD, Xu Y: **A novel raw starch digesting alpha-amylase from a newly isolated *Bacillus* sp. YX-1: purification and characterization.** *Bioresour Technol* 2008, **99**:4315-4320.
5. Burhan A, Nisa U, Gökhan C, Ömer C, Ashabil A, Osman G: **Enzymatic properties of a novel thermostable, thermophilic, alkaline and chelator resistant amylase from an alkaliphilic *Bacillus* sp. isolate ANT-6.** *Process Biochem* 2003, **38**:1397-1403.
6. Moshfegh M, Shahverdi AR, Zarrini G, Faramarzi MA: **Biochemical characterization of an extracellular polyextremophilic alpha-amylase from the halophilic archaeon *Halorubrum xinjiangense*.** *Extremophiles* 2013, **17**:677-687.
7. Pancha I, Jain D, Shrivastav A, Mishra SK, Shethia B, Mishra S, Mohandas VP, Jha B: **A thermoactive alpha-amylase from a *Bacillus* sp. isolated from CSMCRI salt farm.** *Int J Biol Macromol* 2010, **47**:288-291.
8. Allala F, Bouacem K, Boucherba N, Azzouz Z, Mechri S, Sahnoun M, Benallaoua S, Hacene H, Jaouadi B, Bouanane-Darenfed A: **Purification, biochemical, and molecular characterization of a novel extracellular thermostable and alkaline alpha-amylase from *Tepidimonas fonticaldi* strain HB23.** *Int J Biol Macromol* 2019, **132**:558-574.
9. Han P, Zhou P, Hu S, Yang S, Yan Q, Jiang Z: **A novel multifunctional alpha-amylase from the thermophilic fungus *Malbranchea cinnamomea*: biochemical characterization and three-dimensional structure.** *Appl Biochem Biotechnol* 2013, **170**:420-435.
